# Supplementary material for: Double-crosslinked network design for self-healing, highly stretchable and resilient polymer hydrogels
Source: Royal Society of Chemistry journal article supplement (doi:10.1039/c5ra26770f), 2016-01-01
Supplement: c5ra26770f1.pdf [file c5ra26770f1.pdf]

## Supporting Information

### **Double-crosslinked network design for self-healing, highly stretchable and resilient polymer hydrogels**

Yinlei Lin,<sup>a, b</sup> Deliu He,<sup>b</sup> Zhifeng Chen,<sup>b</sup> Liying Wang<sup>b</sup> and Guangji Li<sup>\*b</sup>

*<sup>a</sup> School of Light Industry and Food Science, South China University of Technology,*

*Guangzhou 510640, China*

*<sup>b</sup> School of Materials Science and Engineering, South China University of Technology,*

*Guangzhou 510640, China*

*\* Corresponding author e-mail: [gjli@scut.edu.cn](mailto:gjli@scut.edu.cn)*

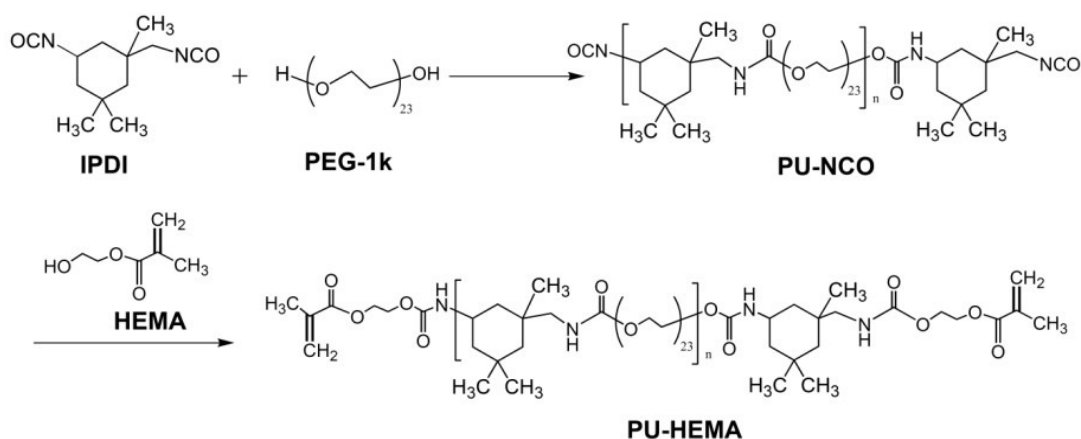

**Scheme S1** The route to preparing PU-HEMA.

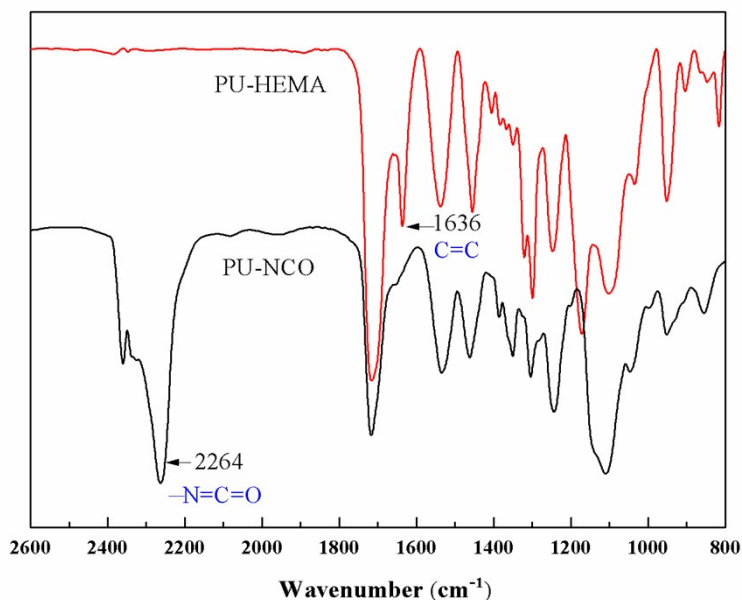

**Fig. S1** FTIR spectra of PU-NCO and PU-HEMA.

The FTIR spectra of PU-NCO and PU-HEMA samples are shown in Fig. S1. From the FTIR spectrum of PU-NCO, the characteristic peak at 2264 cm<sup>-1</sup> assigned to the -N=C=O asymmetric stretching vibration can be clearly observed, while in the FTIR spectrum of PU-HEMA, this peak disappears and a new peak appears at 1636 cm<sup>-1</sup>, which is attributed to the stretching vibration of C=C in HEMA unit. It means that no residual PU-NCO exists in the synthesized PU-HEMA, thus confirming the formation of PU-HEMA and proving the completeness of the reaction between PU-NCO and HEMA.

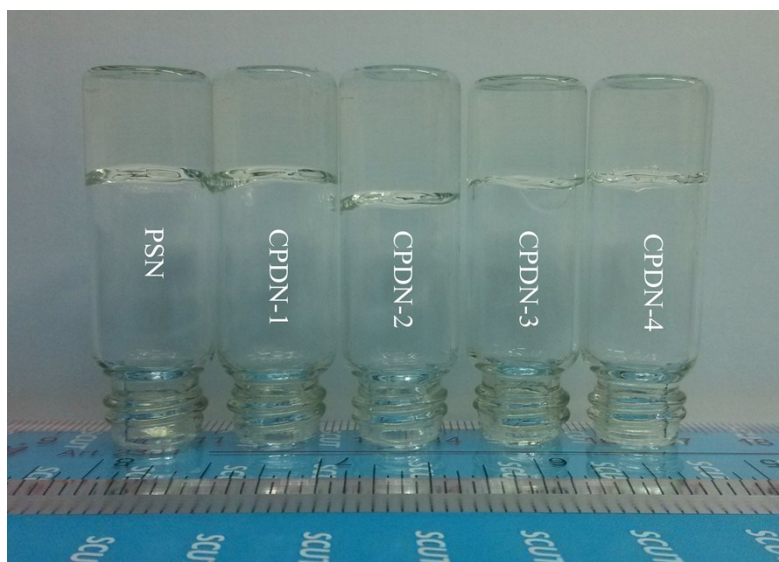

**Fig. S2** Photograph of the hydrogel samples.

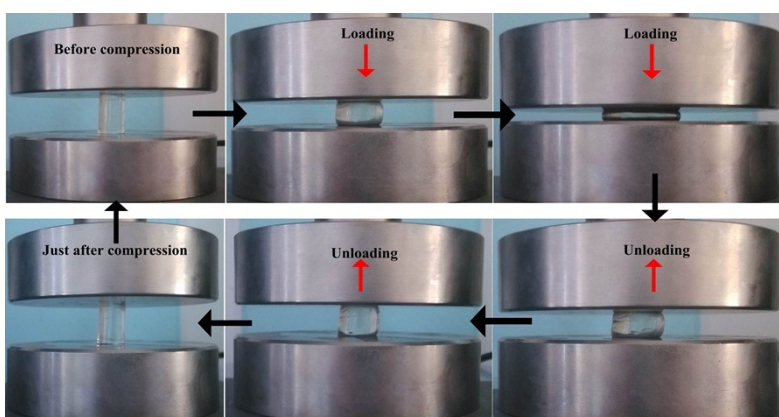

**Fig. S3** Photos of the CPDN hydrogel sample during cyclic uniaxial compression tests.

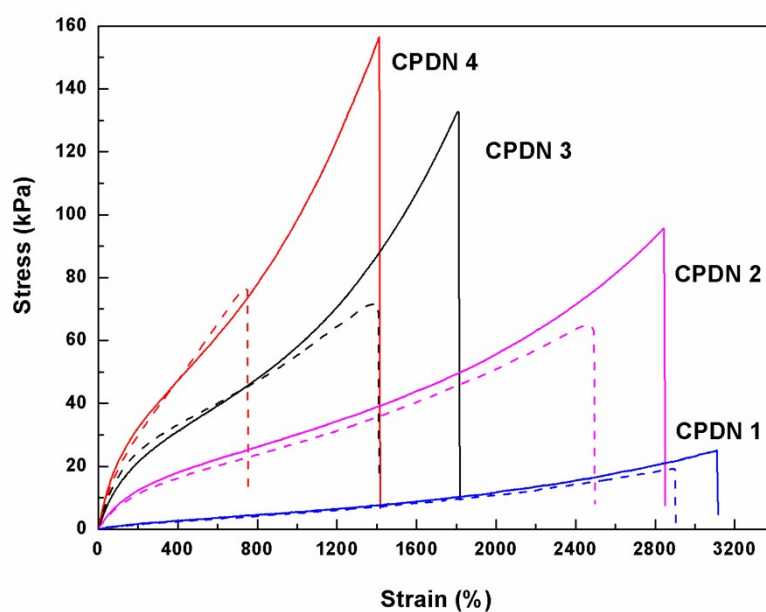

**Fig. S4** Tensile stress–strain curves of the original CPDN hydrogel samples (solid line) and the corresponding self-healed CPDN hydrogel samples at 30-min healing time (dotted line).
